# Supplementary material for: Free Triiodothyronine Is Associated With Hepatic Steatosis and Liver Stiffness in Euthyroid Chinese Adults With Non-Alcoholic Fatty Liver Disease
Source: PubMed Central journal article supplement (PMC8387962; doi:10.3389/fendo.2021.711956), 2021-08-12
Supplement: Image_1.pdf [file Image_1.pdf]

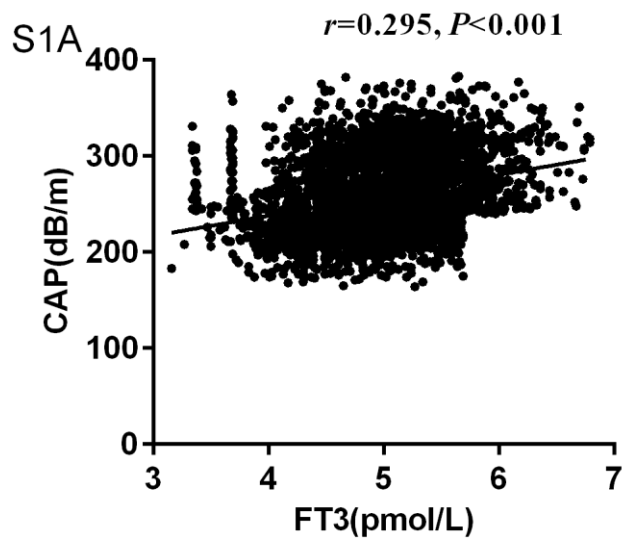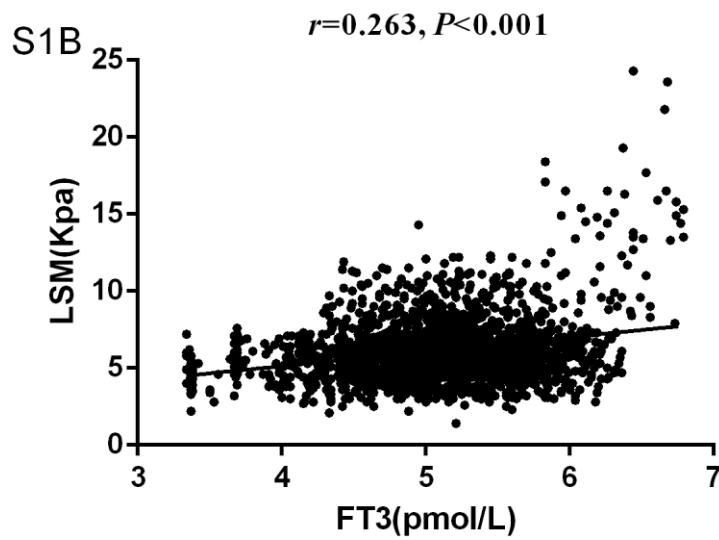

Supplement Figure 1. The association of FT3 levels with FAP value and LSM value. (S1A. The association of FT3 levels with FAP value in all participants; S1B. The association of FT3 levels with LSM value in participants with NAFLD)
